# Supplementary material for: Prevalence and Associated Factors of Menstrual Irregularities Among Reproductive-age Women Attending Kaah Hospital, Hargeisa, Somaliland: A Cross-sectional Study
Source: Research Square preprint supplement (doi:10.21203/rs.3.rs-8436991/v1), 2026-01-14
Supplement: Supplementary file 1 [file 4a61ccf210772f189b3f25b0.docx]

**Questionnaire for the evaluation of menstrual irregularities among women of reproductive age attending KAAH hospital**

1. Sociodemographic Information
2. Age : _________
3. Marital status

- Single
- Married
- Divorced/widowed

1. Education level

- No formal education
- Primary
- Secondary
- Tertiary

1. Monthly household income : _________
2. Medical and Hormonal Health
3. Have you even been diagnosed with hormonal imbalance?

- Yes
- No

Do you experience menstrual irregularities?

- Yes
- No

1. Lifestyle and Behavioral Factors
2. How would you describe your diet?

- Balanced fat and calorie
- Irregular meals (high-fat or low-calorie)

1. Do you smoke?

- Yes
- No

1. Do you consume alcohol?

- Yes
- No

1. Did you get adequate sleep (min. 7 hours/day) last week?

- Yes
- No

1. Psychosocial Aspects
2. Perceived Stress Scale (PSS)

For each question choose from the following alternatives:

0 = never

1 = almost never

2 = sometimes

3 = fairly often

4 = very often

_____ 1. In the last month, how often have you been upset because of something that happened unexpectedly?

_____ 2. In the last month, how often have you felt that you were unable to control the important things in your life?

_____ 3. In the last month, how often have you felt nervous and stressed?

_____ 4. In the last month, how often have you felt confident about your ability to handle your personal problems?

_____ 5. In the last month, how often have you felt that things were going your way?

_____ 6. In the last month, how often have you found that you could not cope with all the things that you had to do?

_____ 7. In the last month, how often have you been able to control irritations in your life?

_____ 8. In the last month, how often have you felt that you were on top of things?

_____ 9. In the last month, how often have you been angered because of things that happened that were outside of your control?

_____ 10. In the last month, how often have you felt difficulties were piling up so high that you could not overcome them?

1. Generalized Anxiety Disorder-7 (GAD-7)

| Over the last two weeks, how often have you been bothered by the following problems? | Not at all | Several days | More than half the days | Nearly every day |
| --- | --- | --- | --- | --- |
| 1. Feeling nervous, anxious, or on edge |  |  |  |  |
| 1. Not being able to stop or control worrying |  |  |  |  |
| 1. Worrying too much about different things |  |  |  |  |
| 1. Trouble relaxing |  |  |  |  |
| 1. Being so restless that it is hard to sit still |  |  |  |  |
| 1. Becoming easily annoyed or irritable |  |  |  |  |
| 1. Feeling afraid, as if something awful might happen |  |  |  |  |
